# Unique Structure and Stability of HmuY, a Novel Heme-Binding Protein of *Porphyromonas gingivalis*

Halina Wójtowicz<sup>1†</sup>, Tibisay Guevara<sup>2†</sup>, Cynthia Tallant<sup>2</sup>, Mariusz Olczak<sup>1</sup>, Aneta Sroka<sup>3</sup>, Jan Potempa<sup>3,4</sup>, Maria Solà<sup>5</sup>, Teresa Olczak<sup>1\*</sup>, F. Xavier Gomis-Rüth<sup>2\*</sup>

**1** Laboratory of Biochemistry, Faculty of Biotechnology, University of Wrocław, Wrocław, Poland, **2** Proteolysis Lab, Department of Structural Biology, Molecular Biology Institute of Barcelona, CSIC, Barcelona, Spain, **3** Laboratory of Microbiology, Faculty of Biochemistry, Biophysics and Biotechnology, Jagiellonian University, Krakow, Poland, **4** Department of Periodontics, University of Louisville School of Dentistry, Louisville, Kentucky, United States of America, **5** Structural MitoLab, Department of Structural Biology, Molecular Biology Institute of Barcelona, CSIC, Barcelona, Spain

## Abstract

Infection, survival, and proliferation of pathogenic bacteria in humans depend on their capacity to impair host responses and acquire nutrients in a hostile environment. Among such nutrients is heme, a co-factor for oxygen storage, electron transport, photosynthesis, and redox biochemistry, which is indispensable for life. *Porphyromonas gingivalis* is the major human bacterial pathogen responsible for severe periodontitis. It recruits heme through HmuY, which sequesters heme from host carriers and delivers it to its cognate outer-membrane transporter, the TonB-dependent receptor HmuR. Here we report that heme binding does not significantly affect the secondary structure of HmuY. The crystal structure of heme-bound HmuY reveals a new all- $\beta$  fold mimicking a right hand. The thumb and fingers pinch heme iron through two apical histidine residues, giving rise to highly symmetric octahedral iron co-ordination. The tetrameric quaternary arrangement of the protein found in the crystal structure is consistent with experiments in solution. It shows that thumbs and fingertips, and, by extension, the bound heme groups, are shielded from competing heme-binding proteins from the host. This may also facilitate heme transport to HmuR for internalization. HmuY, both in its apo- and in its heme-bound forms, is resistant to proteolytic digestion by trypsin and the major secreted proteases of *P. gingivalis*, gingipains K and R. It is also stable against thermal and chemical denaturation. In conclusion, these studies reveal novel molecular properties of HmuY that are consistent with its role as a putative virulence factor during bacterial infection.

**Citation:** Wójtowicz H, Guevara T, Tallant C, Olczak M, Sroka A, et al. (2009) Unique Structure and Stability of HmuY, a Novel Heme-Binding Protein of *Porphyromonas gingivalis*. PLoS Pathog 5(5): e1000419. doi:10.1371/journal.ppat.1000419

**Editor:** C. Eric Stebbins, The Rockefeller University, United States of America

**Received:** February 5, 2009; **Accepted:** April 7, 2009; **Published:** May 8, 2009

**Copyright:** © 2009 Wójtowicz et al. This is an open-access article distributed under the terms of the Creative Commons Attribution License, which permits unrestricted use, distribution, and reproduction in any medium, provided the original author and source are credited.

**Funding:** This study was supported by grants from Spanish ministries (BIO2006-02668, BFU2006-09593, BIO2009-XXXXX, PSE-010000-2007-1, and CONSOLIDER-INGENIO 2010 Project "La Factoría de Cristalización" (CSD2006-00015)) and by grant 20055GR00280 from the Generalitat de Catalunya. Additional funding was obtained from grants N401 029 32/0742 and 1642/B/P01/2008/35 from the Department of Scientific Research, Polish Ministry of Science and Higher Education; from US National Institutes of Health grant DE 09761; and from the European Union through EU FP6 Strep Project LSHG-2006-018830 "CAMP" and EU FP7 Collaborative Project 223101 "AntiPathoGN". Further funding was provided by ESRF (<http://www.esrf.eu/>) for data collection. The funders had no role in study design, data collection and analysis, decision to publish, or preparation of the manuscript.

**Competing Interests:** The authors have declared that no competing interests exist.

\* E-mail: Teresa.Olczak@biotech.uni.wroc.pl (TO); fxgr@ibmb.csic.es (FXG-R)

† These authors contributed equally to this study and share first authorship.

## Introduction

Periodontitis causes chronic inflammation of the gums and it affects 10–15% of adults worldwide, potentially leading to tissue destruction and tooth loss, and *Porphyromonas gingivalis* is its main etiological agent [1,2]. In addition, *P. gingivalis*, an anaerobic black-pigmented, Gram-negative bacterium, has been implicated in cardiovascular diseases, respiratory diseases, diabetes, osteoporosis, and pre-term low birth-weight [3–5]. The pathogen cannot synthesize protoporphyrin IX but acquires exogenous heme ("heme" is here used to refer indistinctly to either Fe<sup>2+</sup>- or Fe<sup>3+</sup>-protoporphyrin IX), an excess of which is stored in the characteristic black pigment on the bacterial cell surface [6–8]. The co-factor is obtained from hemoglobin, haptoglobin-hemoglobin, myoglobin, hemopexin, serum albumin, lactoperoxidase, cytochrome c, and catalase by the action of hemolysins and proteases [9–12]. In addition, *P. gingivalis* and other Gram-negative bacteria possess systems to bind locally liberated heme such as

secreted heme-binding proteins and hemophores [13,14]. One such hemophore is HasA, employed by *Serratia mercenscens* to scavenge host heme in order to deliver it to the receptor, HasR, for internalization [15]. Similarly, hemophores have been described in *Haemophilus influenzae*, *Yersinia enterocolitica*, *Pseudomonas aeruginosa*, and *Bacillus anthracis* [13,16–20]. Further heme is transported into the cell through outer-membrane receptors [21].

In *P. gingivalis*, heme is primarily imported by heme-binding protein, HmuY, and its cognate outer-membrane receptor, HmuR [22]. The latter is involved in heme transport through the outer membrane and probably depends on the interaction with protein TonB, which is needed to transduce energy for the passage of heme and other ligands into the periplasm in most Gram-negative pathogens [11,14,22,23]. The two Hmu proteins are encoded in tandem by the *hmu* operon, which comprises six genes in total, *hmuYRSTUV*. The locus is regulated by iron [23] and by a transcriptional repressor encoded by gene *pg1237* [24], and its disruption leads to a 70% decrease in heme binding and a 45%

## Author Summary

Pathogenic bacteria cause infection in humans as found in periodontitis, which is a chronic inflammation of the gums caused by *Porphyromonas gingivalis*. As part of the infective process, bacteria must acquire nutrients to survive and multiply at the infection site, and among such nutrients is heme. This is an iron-dependent co-factor of several indispensable enzymes and proteins. *P. gingivalis* liberates heme from host heme-binding proteins through the action of proteases and arranges its transport to the bacterial cell through two proteins, HmuY and HmuR. They grab free heme and transport it across the bacterial membrane into the cell, respectively. This function poses stringent conditions on these proteins regarding stability and resistance toward the host immune system. We report here that HmuY is very stable and that it displays a novel protein fold, which consists only of  $\beta$ -strands. It reminds us of a right hand, whose fingers trap heme. Once heme is bound, HmuY forms tetramers, which have the four heme-binding sites buried and thus protected from competing host heme-binding proteins. This feature also facilitates heme transport to HmuR and into the bacterial cell. All these data may help to develop new antibacterial agents at times in which resistance toward antibiotics, both at intensive healthcare stations and in the community, poses serious challenges to human health.

decrease in heme uptake [25]. Potential protein pairs with high sequence similarity to HmuY and HmuR have been identified on contiguous genes in other bacteroidetes (*Microscilla marina*, *Prevotella intermedia*, and *Bacteroides* from the species *vulgatus*, *fragilis*, *ovatus*, *thetaiotaomicron*, *caccae*, *stercori*, and *coprocola*), proteobacteria (*Plesiocystis pacifica*, *Stigmatella aurantica*, and *Myxococcus xanthus*), spirochaetes (*Leptospira biflexa*), and chlorobi (*Chloroherpeton thalassium*). This suggests a widespread mechanism for heme uptake (our unpublished data; [23,25]). HmuY is an outer-membrane-associated lipoprotein, which is identical in sequence to a *P. gingivalis* envelope protein designated fibroblast activating factor [26]. This factor induces proliferation and protein synthesis in normal human gingival fibroblasts, indicating an additional role for HmuY in the host immune response. The *hmuY* gene encodes a 23-kDa protein, with no significant sequence similarity to any other protein, whose 25 first residues are not present in the purified protein. This stretch comprises a leader sequence, a lipid-binding site, and a potential protease cleavage site [23,25]. The protein is functional as a dimer in its heme-depleted form and as a tetramer once heme is bound [23]. Heme bound to HmuY, with a midpoint potential of 136 mV, displays a low-spin six-fold  $\text{Fe}^{3+}$  coordination sphere with the participation of residues His134 and His166, as revealed by point mutation studies [27].

In order to shed light on the mechanisms of heme binding and transport through HmuY, we set out to assess the folding and stability properties of HmuY in its heme-depleted (apo-HmuY) and heme-complexed (holo-HmuY) forms, as well as its susceptibility to proteolysis by trypsin and gingipains K (Kgp) and R (RgpA and RgpB). In addition, we solved the X-ray crystal structure of holo-HmuY. Taken together, these data enabled us to propose a mechanism for Hmu-mediated heme uptake by *P. gingivalis*.

## Results/Discussion

### Conformational stability of HmuY

Assessment of the biophysical response of apo- and holo-HmuY to thermal and chemical denaturation may contribute to unravel

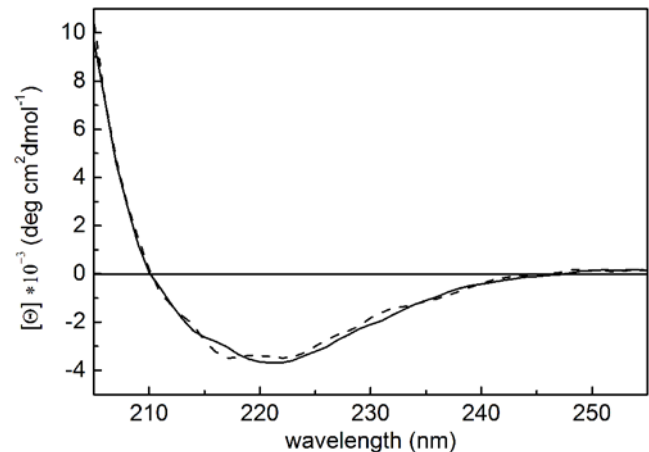

**Figure 1. Far-UV CD analysis of *P. gingivalis* apo- and holo-HmuY.** Spectra were recorded for purified HmuY (solid line) and the HmuY-heme complex at a 1:1 molar ratio (dashed line). doi:10.1371/journal.ppat.1000419.g001

heme binding and transport at the infection site. Previously, a far-UV CD spectrum of native apo-HmuY had shown that the protein has mainly a  $\beta$  structure [23]. Here we found that heme binding did not affect the spectrum, indicating absence of significant structural changes of the secondary structure (Figure 1). In unfolding studies (Figure 2), far-UV CD spectroscopy revealed that thermal denaturation of HmuY (encompassing the sequence of the purified natural protein; Asp26-Lys216) was irreversible, leading to protein precipitation (data not shown). In contrast, guanidinium hydrochloride (GdnHCl)-induced chemical denaturation was reversible and no significant difference in the equilibrium unfolding profiles of apo- and holo-HmuY was observed (Figure 2C). Both forms tended to follow one-step unfolding process with a calculated free energy of denaturation ( $\Delta G_{den}$ ) of  $34.1 \pm 12.4$  kJ/mol. To obtain information on local changes of the tertiary structure of HmuY and the heme cavity, we further studied thermal and chemical denaturation by intrinsic tryptophan fluorescence spectroscopy. Thermal denaturation is reversible and gives rise to sigmoidal unfolding curves for both HmuY forms (Figure 2A and 2B). However, the initial part of the curves, especially that of holo-HmuY, deviates from the one-step reverse-unfolding mechanism. Exposure of apo-HmuY to increasing concentrations of GdnHCl reduced fluorescence intensity, giving a sigmoidal shape to the unfolding curve (Figure 2D). In contrast, the unfolding profile of holo-HmuY (Figure 2E) does not account for a typical one-step reverse-mechanism transition unless the reference wavelength is far away from the heme-binding maximum (323 nm). This suggests that holo-HmuY may exhibit local differences in the tertiary structure when compared with apo-HmuY similar to HasA and HasAp [18,28,29]. Simultaneously, we examined heme loss by holo-HmuY by absorbance change in the Soret region (Figure 2F and 2I). Holo-HmuY retained  $\sim 70\%$  of the bound heme up to 3 M GdnHCl, and even in the presence of 4 or 5 M GdnHCl, it remained partially loaded with the co-factor. An interesting feature can be observed at intermediate GdnHCl concentrations (3.6 M) and at  $\sim 50^\circ\text{C}$ . Although the overall fluorescence spectra are similar, thus indicating that the conformations are related (Figure 2G and 2H), the possibility of intermediate species should not be excluded. Changes in the fluorescence spectra in the pre-transitional region may indicate differences in local conformation of HmuY upon heme binding and tetramer formation. This corresponds to the end of the pre-

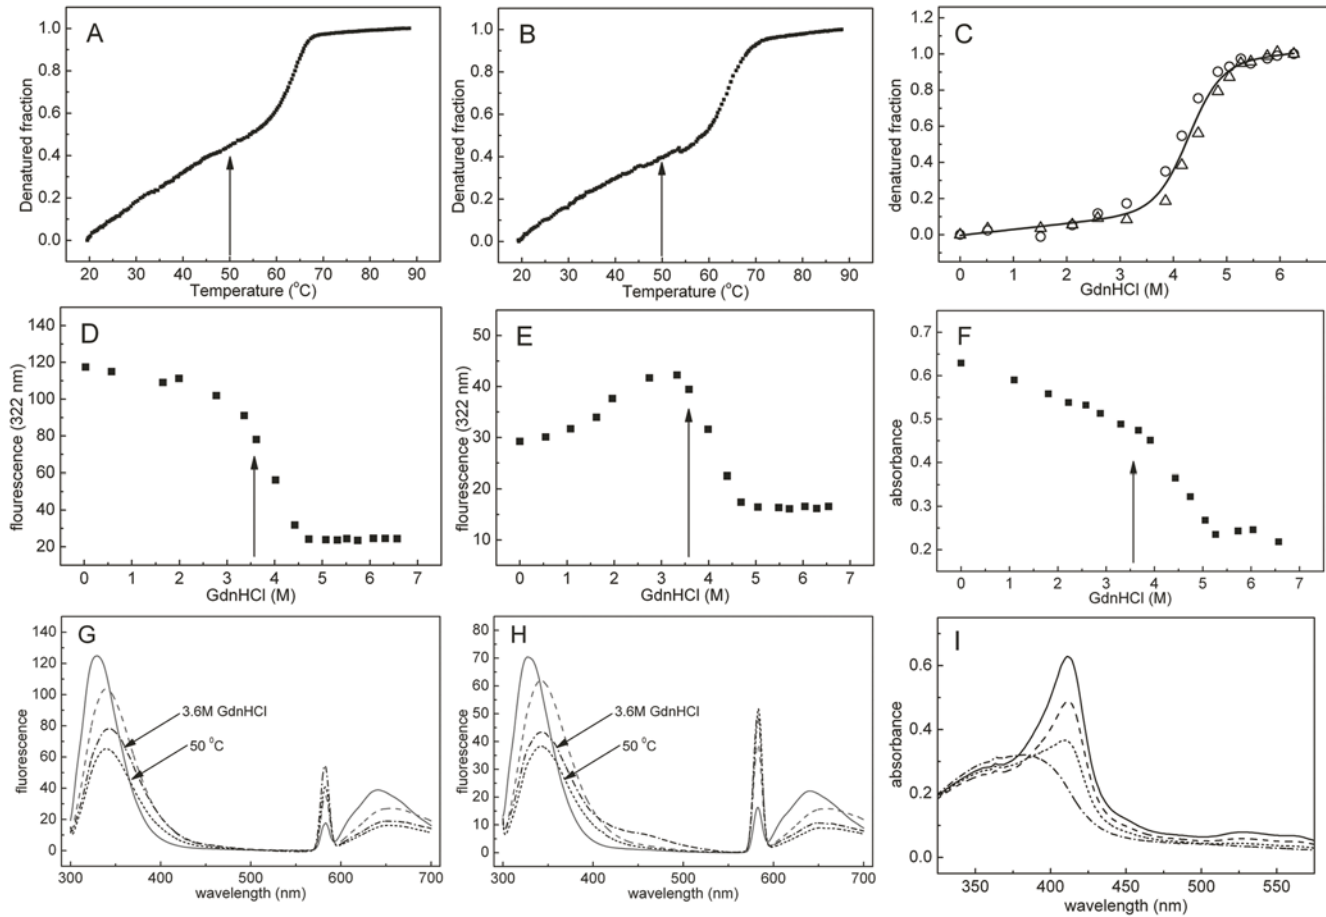

**Figure 2. Thermal and chemical unfolding studies.** Unfolding transition curves of apo-HmuY (A) and holo-HmuY (B) as a function of temperature measured by tryptophan intrinsic fluorescence. Unfolding transition curves as a function of GdnHCl concentration measured by CD ellipticity at 225 nm (C) for apo-HmuY (circles) and holo-HmuY (triangles). The solid line shows the goodness-of-fit assuming a two-state reverse transition model. Unfolding transition curves as a function of GdnHCl concentration measured by tryptophan intrinsic fluorescence for apo-HmuY (D) and holo-HmuY (E). Heme dissociation from holo-HmuY (F) measured by absorption spectroscopy in the Soret region. Fluorescence spectra of apo-HmuY (G) and holo-HmuY (H): HmuY in 20 mM sodium phosphate, 1 M GdnHCl, pH 6.5 at 20°C before (solid lines), after thermal denaturation and cooling to 20°C (dashed lines), and at 50°C (dotted lines); HmuY in 20 mM sodium phosphate, 20 mM NaCl, 3.6 M GdnHCl, pH 7.4 at 20°C (dashed-dotted lines). (I) Soret region spectra of HmuY-heme: 20 mM sodium phosphate, 20 mM NaCl, pH 7.4 without GdnHCl (solid line), with 3 M (dashed line), 4 M (dotted line), and 6 M (dashed-dotted line) GdnHCl at 20°C. doi:10.1371/journal.ppat.1000419.g002

transitional region regardless of the technique used, as indicated by arrows in Figure 2A, 2B, 2D, 2E, and 2F. It may be easier to see the intermediates when heme is bound to HmuY (Figure 2E), since the co-factor modulates the fluorescence characteristics of HmuY tryptophans. We conclude that the first step of the HmuY-heme complex unfolding is a tetramer-to-dimer transition, subsequently leading to heme loss. Posterior dimer dissociation and protein denaturation are probably the limiting steps in this process. Taking all together, HmuY stability against heat and GdnHCl-induced denaturation is similar to or higher than that of other stable proteins bound to heme [30]. However, in contrast to the latter, both apo- and holo-HmuY show comparable resistance to denaturation, although some local changes in the tertiary structure may occur upon heme binding.

### Resistance of HmuY to proteolytic digestion

Ligand binding may enhance resistance to proteolysis [31], so trypsin was assayed as a degrading agent against HmuY. In addition, response to the cysteine proteases Kgp, RgpA, and RgpB was examined, as these are secreted by *P. gingivalis* upon infection

and target host hemoproteins [12]. Both apo- and holo-HmuY were fully resistant to digestion by trypsin and gingipains in their native state under the conditions assayed (Figure 3). In contrast, protein samples previously subjected to thermal denaturation were completely degraded. These data strongly suggest that HmuY is very stable and compactly folded, regardless of the bound co-factor, and insensitive against endogenous proteases.

### Protomeric structure of holo-HmuY

The structure of HmuY is asymmetric, with maximal dimensions of  $\sim 55 \times 40 \times 35$  Å, and it resembles a right hand (Figure 4A). It consists of a roughly globular nucleus reminiscent of a palm, out of which protruding segments mimicking thumb and fingers emerge (Figure 4A, 4B, and 4C). As anticipated by CD spectroscopy (see above and [23]), HmuY is an all  $\beta$ -protein constituted by 15  $\beta$ -strands. Both the N- and C-terminus are located on the protein surface corresponding to the palm and they point toward the wrist (following the analogy with a hand). They precede and succeed, respectively, two  $\beta$ -strands that participate in a twisted  $\beta$ -sandwich or laterally open  $\beta$ -barrel made up of two

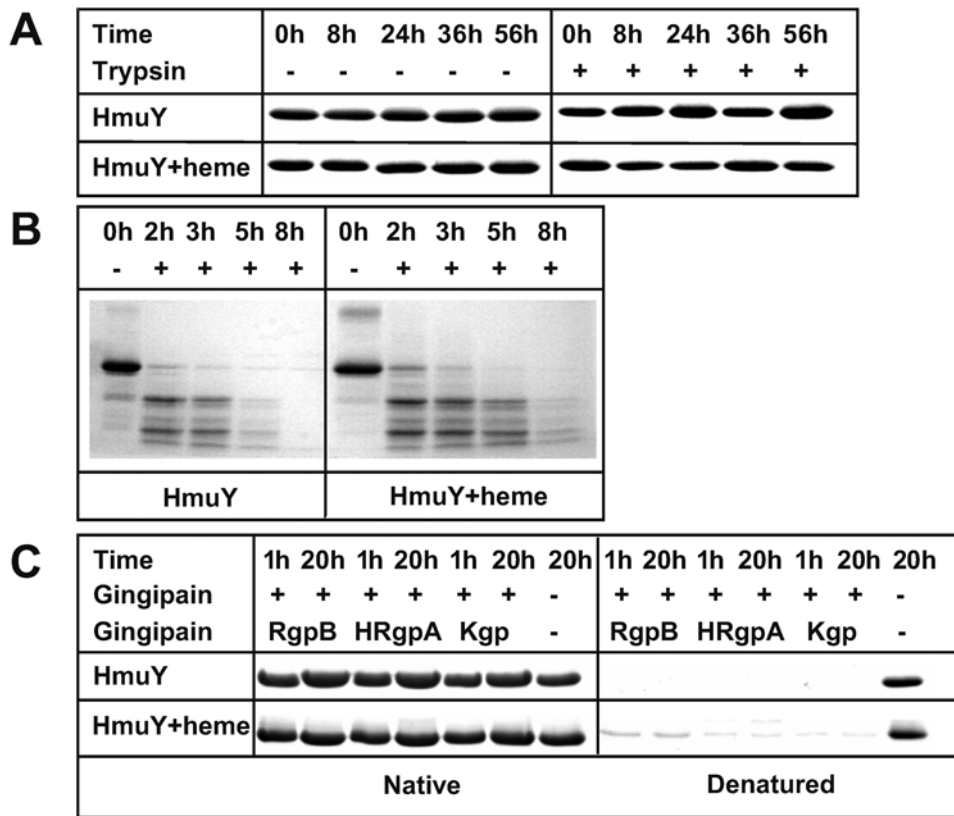

**Figure 3. Limited proteolysis experiments.** Proteolytic susceptibility of apo- and holo-HmuY (A) in their native states and (B) after thermal denaturation (incubation at 95°C for 10 min) toward trypsin and (C) Kgp, RgpA, and RgpB. doi:10.1371/journal.ppat.1000419.g003

antiparallel  $\beta$ -sheets of, respectively, five (sheet I; strands  $\beta 1+\beta 6+\beta 13-\beta 15$ ; connectivity  $+4x, -1, -1, -1$ ) and four (sheet II; strands  $\beta 2-\beta 5$ ; connectivity  $-1, +2x, +1$ ) strands (Figure 4B and 4C). A large twisted and curled  $\beta$ -ribbon ( $\beta 7\beta 8$ ) is inserted into the front of the palm mimicking a thumb and two further ribbons are found on the back resembling a pinky (strand  $\beta 12$ ), a ring finger ( $\beta 11$ ), a middle finger ( $\beta 10$ ), and an index finger ( $\beta 9$ ) (top to bottom in Figure 4C). Sheet I is curled toward sheet II and twisted for  $\sim 95^\circ$ , while sheet II is arched away from sheet I and twisted for  $\sim 85^\circ$ . This gives rise to a large hydrophobic cavity at the interface between sheets, which is the core of the protein and contributes to most of the palm. It is created by side chains from strands  $\beta 1$  and  $\beta 2$ , the loop connecting  $\beta 2$  with  $\beta 3$  ( $L\beta 2\beta 3$ ), and strands  $\beta 3-\beta 6$  and  $\beta 13-\beta 15$ . In addition, hydrophobic residues provided by  $L\beta 6\beta 7$ ,  $L\beta 8\beta 9$ , and  $L\beta 10\beta 11$  close the  $\beta$ -sandwich on the flank bordered by  $\beta 5$  (sheet II) and  $\beta 6$  (sheet I) (Figure 4C). Two smaller hydrophobic cores are observed on the convex side of either sheet by side chains provided by  $\beta 6$ ,  $\beta 13-\beta 15$ , and  $L\beta 6\beta 7$ , which folds back on top of the sheet (sheet I), and  $L\beta 3\beta 4$  plus  $L\beta 5\beta 6$  (sheet II). All together, these hydrophobic clusters give rise to a molecule, which provides a structural explanation for its high stability and resistance toward denaturation and proteolysis.

### Heme binding in holo-HmuY

Together with the finger-proximal lateral wall of the central hydrophobic core, thumb and fingers give rise to the heme-binding cavity, which is radically different in structure and location within the molecule from those found in any other heme-binding protein described. The cavity occupies a volume of  $2,136 \text{ \AA}^3$  and is made up

by 37 residues, including 29 hydrophobic or neutral residues and eight charged residues (Figure 4D). A single  $\text{Fe}^{3+}$ -chelating heme b molecule (hemin) is inserted laterally like a wedge into the cavity, curiously with its charged propionate substituents pointing toward the palm and the hydrophobic methyl and vinyl substituents pointing toward the exterior (Figure 4C and 4D). The protein:heme complex is characterized by an interaction surface of  $532 \text{ \AA}^2$ , which is 61% of the total accessible surface of the co-factor ( $868 \text{ \AA}^2$ ). This value is rather low if compared with other heme-protein complexes [32] but can be explained in terms of the quaternary arrangement (see below). Complex interactions are mainly hydrophobic and entail three hydrogen bonds, one salt bridge, and van-der-Waals interactions between 13 protein residues (Table 1 and Figure 4D). Further noteworthy are a salt-bridge of  $\text{Arg}79 \text{ N}\eta 2$  and two hydrogen bonds of  $\text{Tyr}80 \text{ O}\eta$  and  $\text{Tyr}13 \text{ O}\eta$  with the carboxylate oxygen atoms of the propionate substituent of pyrrol ring a, as well as a hydrogen bond between  $\text{Thr}124 \text{ O}\gamma 1$  and the propionate of ring d. However, the most relevant contacts are the metallo-organic bonds established between the heme iron and the  $\text{N}\epsilon 2$  atoms of  $\text{His}134$  ( $2.04 \text{ \AA}$  away), provided by thumb-strand  $\beta 8$ , and  $\text{His}166$  ( $2.09 \text{ \AA}$ ), from ring-finger-strand  $\beta 11$ . These two ligands occupy the apical positions of an octahedral iron co-ordination sphere, whose equatorial ligands are the four porphyrin nitrogen atoms (at  $2.03-2.06 \text{ \AA}$ ). Accordingly, ion co-ordination is exerted by six nearly equivalent and equidistant  $\text{sp}^2$ -hybridized nitrogen atoms and is thus highly symmetrical, which should redound to a very stable complex. In addition, both protein histidine side chains are in hydrophobic environments:  $\text{His}134$  is surrounded by  $\text{Tyr}127$ ,  $\text{Met}129$ ,  $\text{Met}136$ , and  $\text{Pro}168$  (from a vicinal complex; see next chapter) and  $\text{His}166$  by  $\text{Phe}156$ ,  $\text{Phe}164$ ,  $\text{Pro}171$ , and the methyl and vinyl groups from an adjacent complex.

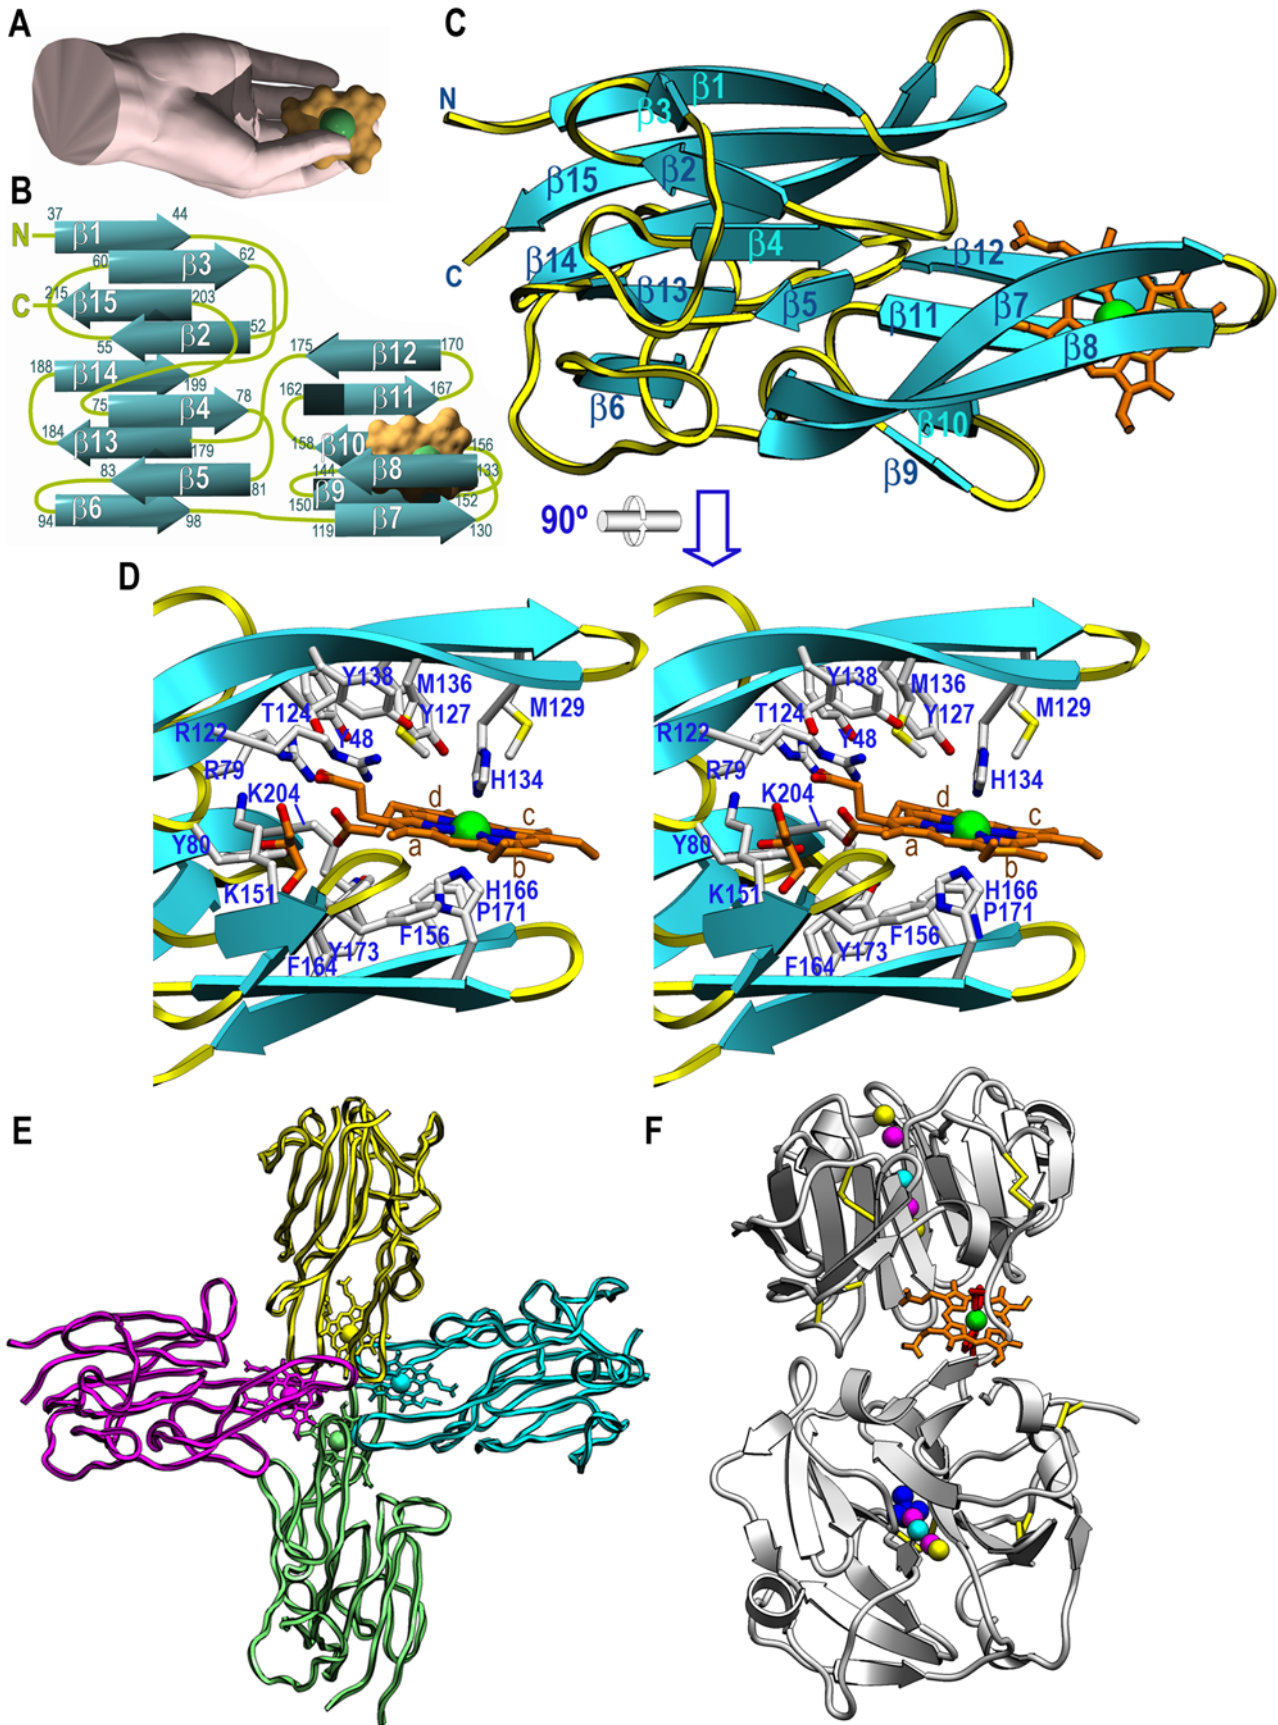

**Figure 4. Structure of holo-HmuY.** (A) The protein mimics a right hand, whose thumb and fingers trap the heme co-factor (surface model in orange with an inserted green sphere for the iron ion). (B) Topology scheme of HmuY, which consists of 15  $\beta$ -strands, each labeled with the protein residues it spans. The heme group is shown as in (A). (C) Richardson plot of holo-HmuY Glu35-Lys216 with the bound heme as an orange stick model and an inserted sphere for the iron. The view was chosen to match (A). (D) Close-up view in stereo of (C) after a horizontal  $90^\circ$  rotation. Protein residue side chains engaged in shaping the heme-binding cavity and in interactions with the co-factor are shown and labeled. The four pyrrole rings of the protoporphyrin IX moiety are also labeled (a–d). (E) Tetrameric quaternary arrangement of holo-HmuY. Each constituting heme/HmuY complex is shown in one color. (F) Richardson plot of rabbit serum hemopexin (PDB access code 1QHU; [32]). The two hemopexin-like  $\beta$ -propeller domains contain central channels to bind ions (colored spheres), and the heme-binding site is at the domain intersection.

doi:10.1371/journal.ppat.1000419.g004

### Quaternary arrangement of holo-HmuY

The quaternary structure of holo-HmuY is a cross-like tetramer of complexes,  $\sim 95 \text{ \AA}$  in diameter, created by the combination of a local and a crystallographic two-fold axis (Figure 4E). This finding fits well with analytical size-exclusion chromatography studies showing that, upon addition of heme, HmuY eluted as a tetramer [23]. The tetramer is made up by interactions between thumb and finger tips and includes  $\beta$ -hairpins  $\beta 7\beta 8$ ,  $\beta 9\beta 10$ ,  $\beta 11\beta 12$ , and  $\beta 14\beta 15$  of each of the four complexes, which contribute through a surface of  $1148\text{--}1174 \text{ \AA}^2$  to the oligomer. This is within the range reported for interaction surfaces usually found in protein complexes [33]. All contacts between vicinal complexes (e.g. the magenta and yellow ones in Figure 4E) are symmetric and include eight hydrogen bonds, two salt bridges and four hydrophobic interactions, two hydrophobic protein-heme and one hydrophobic inter-heme contacts (Table 1). Fewer contacts are observed between opposite complexes (e.g. the magenta and cyan ones in Figure 4E); they just include three symmetric hydrophobic

interactions established by Ala169, Asp132, and the vinyl substituents of heme pyrrole rings b (Table 1). The overall arrangement entails that the four heme groups are in direct contact with each other in the center of the tetramer. Each co-factor molecule has a buried surface of  $636\text{--}639 \text{ \AA}^2$ , 74% of its total area. The inter-iron distances are  $13 \text{ \AA}$  (vicinal monomers) and  $17 \text{ \AA}$  (opposite monomers), within the range of values observed in electron-transport proteins such as cytochrome c ( $9\text{--}18 \text{ \AA}$ ; [34,35]), although no function of HmuY in redox biochemistry or electron transport has been postulated. As a result of this packing the four heme groups are buried and thus protected from competing heme-binders.

### Structural aspects of related heme-binding proteins

Structure similarity searches following a variety of algorithms failed to identify significant matches extending beyond selected parts of the central  $\beta$ -sandwich, so we conclude that HmuY conforms to a novel all  $\beta$ -fold. Among structurally characterized

**Table 1. Protein:co-factor and protein tetramerization contacts.**

| HmuY:heme contacts <sup>a</sup>                                     | Hydrogen bonds and polar interactions and metallo-organic bonds (in $\text{\AA}$ ) |            |                         | Van-der-Waals interactions performed by protein residues |           |        |
|---------------------------------------------------------------------|------------------------------------------------------------------------------------|------------|-------------------------|----------------------------------------------------------|-----------|--------|
|                                                                     | Arg79 N $\eta$ 2                                                                   | Hem301 O1A | 2.81                    | Tyr80                                                    | Thr124    | Tyr127 |
| Tyr80 O $\eta$                                                      | Hem301 O2A                                                                         | 2.59       | Met129                  | Met136                                                   | Gly155    |        |
| Thr124 O $\gamma$ 1                                                 | Hem301 O1D                                                                         | 2.70       | Phe156                  | Phe164                                                   | Ala169    |        |
| His134 N $\epsilon$ 2                                               | Hem301 FE                                                                          | 2.04       | Gly170                  | Pro171                                                   | Tyr173    |        |
| His166 N $\epsilon$ 2                                               | Hem301 FE                                                                          | 2.09       | Lys204                  |                                                          |           |        |
| Tyr173 O $\eta$                                                     | Hem301 O2A                                                                         | 2.60       |                         |                                                          |           |        |
| Contacts between contiguous monomers (molecules 1-2) <sup>a,b</sup> | Hydrogen bonds and polar interactions (in $\text{\AA}$ )                           |            |                         | Van-der-Waals interactions (in $\text{\AA}$ )            |           |        |
| Glu128 O $\epsilon$ 1                                               | Lys204 N $\zeta$                                                                   | 2.99/2.97  | Met129 C $\beta$        | Hem301 CMA                                               | 3.59/3.60 |        |
| Pro131 O                                                            | Ala169 N                                                                           | 2.86/2.86  | Pro131 C $\beta$        | Thr172 C $\gamma$ 2                                      | 3.64/3.64 |        |
| Pro131 N                                                            | Pro171 O                                                                           | 3.40/3.39  | Asp132 C                | Ala169 C $\beta$                                         | 3.90/3.88 |        |
| Gly133 N                                                            | Ala169 O                                                                           | 3.06/3.05  | Hem301 CBB              | Hem301 CBB                                               | 3.55      |        |
| Pro168 N                                                            | Pro131 O                                                                           | 3.38/3.38  |                         |                                                          |           |        |
| Contacts between opposite monomers (molecules 1-3) <sup>c</sup>     | Van-der-Waals interactions (in $\text{\AA}$ )                                      |            |                         |                                                          |           |        |
|                                                                     |                                                                                    |            | Ala169 C $\beta$        | Ala169 C $\beta$                                         | 3.28      |        |
|                                                                     |                                                                                    |            | Asp132 C $\gamma$       | Asp132 C $\gamma$                                        | 4.00      |        |
|                                                                     |                                                                                    |            | Hem301 CBB <sup>b</sup> | Hem301 CBB <sup>b</sup>                                  | 3.99      |        |

<sup>a</sup>Atom CBB is the terminal vinyl methylene carbon of pyrrole ring b, and atom CMA is the methyl carbon of pyrrole ring a (see Figure 4D for pyrrole naming within the heme protoporphyrin ring). Atoms O1A, O2A, and O1D are carboxylate oxygens of the propionate substituents of rings a and d, respectively.

<sup>b</sup>All the interactions between molecule 1 and molecule 2 are symmetric. Distances 1-2 and 2-1 are given separated by a slash.

<sup>c</sup>All the interactions between molecule 1 and molecule 3 are symmetric and made by identical atoms.

doi:10.1371/journal.ppat.1000419.t001

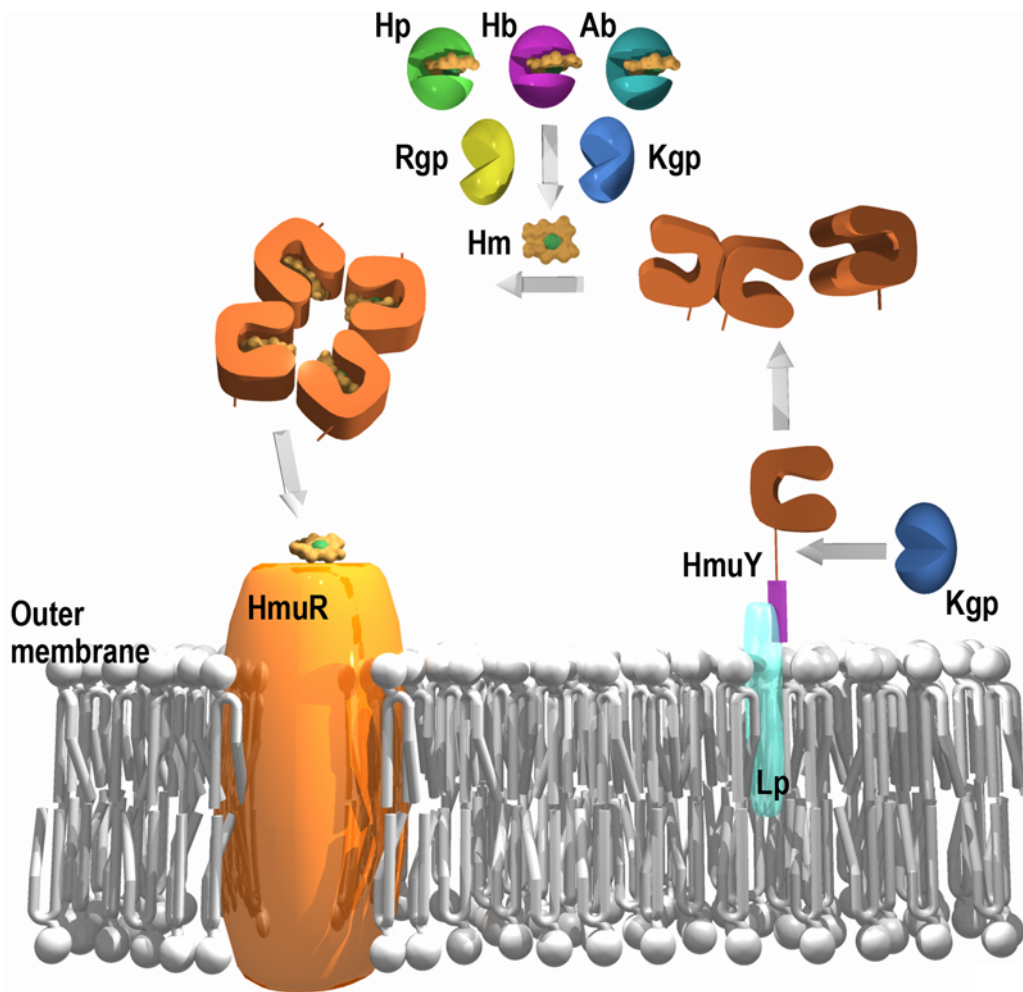

**Figure 5. Proposed working mechanism for the extracellular hmu components.** HmuY and HmuR are shown with their proposed roles in heme uptake, as well as the other suggested players. Hb stands for hemoglobin; Hp for hemopexin; Ab for serum albumin; Rgp for gingipain R types A and B; Kgp for gingipain K; Lp for lipid; and Hm for heme (represented as in Figure 4A).  
doi:10.1371/journal.ppat.1000419.g005

heme-binding proteins participating in iron storage and transport are the archetypes hemoglobin and myoglobin, which like related globins and serum albumin, are all- $\alpha$  class proteins [36–38]. With respect to functional analogs of HmuY, only the closely-related hemophores HasA and HasAp from *S. marcescens* and *P. aeruginosa*, respectively, have been reported for their structure [18,28]. They consist of a two layer  $\alpha/\beta$ -sandwich with a meander fold characterized by a twisted antiparallel six-stranded  $\beta$ -sheet with four helices on its concave side. The overall shape of the molecules is reminiscent of a fish, which traps a heme in its mouth. Here, the iron is octahedrally co-ordinated by an apical histidine and a tyrosine. Like HmuY, HasA and HasAp do not undergo major structural rearrangement upon heme binding.

The only other structurally characterized all- $\beta$ -structure engaged in heme transport and storage is serum hemopexin [32,39]. It consists of two tandem  $\sim$ 200-residue fourfold  $\beta$ -propeller domains, which are thick discs consisting of four blades arranged around a central channel. Each blade is made up of a twisted four-stranded antiparallel  $\beta$ -sheet [39]. The functionally relevant oligomerization state is a monomer, and heme binding correlates with major structural rearrangement [32]. In the heme-bound complex, the two hemopexin domains are roughly perpendicular to each other and connected by a partially flexible 20-residue

linker (Figure 4F). The heme-binding site resides at the interface between domains, which is covered by a cluster of conserved aromatic residues. As in HmuY, heme binding is exerted by two histidine residues, one provided by the linker, which bind the iron on its two apical positions, and a cluster of basic residues and tyrosines that bind the heme propionate groups [32]. Further as in HmuY, the heme propionate groups are buried in the molecule and the hydrophobic substituents of heme rings b and c likewise point toward the exterior of the molecule. However, beyond these very detailed features and a generally apolar environment of the heme-binding cavity, there is no further structural similarity between holo-hemopexin and holo-HmuY.

#### Proposed working mechanism for the Hmu system

Accumulating biochemical and genetic evidence [13,14,22–25,40,41], as well as the present data, suggest the following mechanism for Hmu-mediated heme uptake in *P. gingivalis* and, by extension, in other related bacteria (Figure 5). HmuY is synthesized and exported to the outer membrane, where it would be anchored to a lipid through an attachment site typical for prokaryotic lipoproteins [42]. Location of HmuY at the outer membrane of intact *P. gingivalis* cells and to outer-membrane vesicles has been shown [23,25,26]. In addition, the existence of a

membrane-attached HmuY species was substantiated by experiments in *Escherichia coli* cells [43]. From the surface, HmuY would be shed by Kgp to enter the inflamed periodontal tissue at the site of infection. This step is backed by N-terminal sequencing of HmuY purified from the culture medium, which revealed that the protein starts with residue Asp26, and that recombinant HmuY comprising five additional upstream residues of the gene-encoded sequence, i.e. starting with Met21-Gly-Lys-Lys-Lys-Asp26, was cleaved at bond Lys25-Asp26 by Kgp *in vitro* (data not shown). Moreover, mRNA encoding HmuY was much more highly expressed than any of the other *hmu*-operon encoded proteins (7–20 times and several orders of magnitude more transcription than HmuR and HmuS-V, respectively [23,25]). This observation, as well as our results demonstrating high stability against denaturation and proteolysis, is consistent with the idea of a protein that is targeted for secretion as a virulence factor during infection. One of the virulence mechanisms in *P. gingivalis* is biofilm formation, which facilitates the long term survival of the bacterium and induces an inflammatory reaction in the host. A recent report showed that HmuY is found predominantly in the biofilm [44]. Furthermore, it was demonstrated that the *P. gingivalis hmuY*-knockout mutant cannot grow in the presence of human serum as a sole heme source, confirming that this protein is necessary for growth of bacteria under low iron/heme conditions, as found in deep biofilm layers [23,45].

Host hemoproteins are present in significant concentrations in the gingival crevice [46], but HmuY would not be able to compete with them for heme binding due to its much lower affinity for the co-factor ( $K_d \sim 3 \mu\text{M}$ , our unpublished data; hemopexin and hemoglobin,  $K_d < 1 \text{ pM}$ , [47,48]; haptoglobin/hemoglobin complex,  $K_d < 1 \text{ M}$ , [49]; serum albumin,  $K_d \sim 10 \text{ nM}$ , [50]). However, gingipains, the major proteases produced and secreted by *P. gingivalis*, as well as other secreted proteases, can efficiently cleave hemoglobin, haptoglobin, and hemopexin, thus liberating heme [10,51–54]. In contrast, we have shown here that HmuY is resistant to proteolysis by gingipains. In an alternative or complementary fashion, release of heme from these hemoproteins could occur spontaneously, as this is a low-energy event [14], or through conformational changes induced in the host hemoproteins that would make the co-factor accessible. In any case, HmuY would take up heme, and this would lead to tetramerization under occlusion of the heme binding sites. Tetrameric HmuY would protect heme from host scavengers and shepherd it to HmuR. At this point, heme transfer to the latter encounters two obstacles: the receptor has ten times lower affinity for heme than HmuY ( $K_d = 24 \mu\text{M}$ ; [21,40,41]) and the heme groups are inaccessible within the holo-HmuY tetramer. Accordingly, this step would probably entail a rupture of the tetramer triggered by the HmuY-HmuR interaction to expose heme. Similarly, disruption of a tight heme/carrier complex to enable heme uptake by a receptor have been reported for the *S. marcescens* HasA-HasR system [15] and for hemopexin-hemopexin receptor [32]. On the basis of our mutational analysis of HmuY heme ligands [27], an initial step in heme transfer could involve disruption of only one of the two axial histidine ligands as found for HasA [15,27]. At this point, a Fe(III)-to-Fe(II) transition is conceivable [27]. Once bound by HmuR, heme would be translocated across the outer membrane into the periplasm. In the absence of the HmuR receptor, heme cannot be efficiently transported into the cells, which retards growth of the *hmuR*-knockout mutant [43]. In addition, this mutant becomes more pigmented, indicating that HmuY binds and stores the accumulating excess of heme on the bacterial cell surface as a result of the broken pipeline. Therefore, HmuY, especially in the form associated with the outer membrane, may also store heme and protect the bacterial

cell from damage induced by free heme. A phenotype of *P. gingivalis hmuY*- and *hmuY/hmuR*-knockout mutants confirms this hypothesis since both strains are less pigmented than the wild-type [23]. Heme translocation by HmuR putatively occurs under assistance of TonB [11,14]. The pernicious oxidative potential of free heme would also require the presence of binding proteins to escort it across the periplasm to the cytoplasm [21]. This step might be performed by the other *hmu* operon proteins, which would be required in much less amount than HmuY: HmuS, which displays sequence similarity with cobN/Mg chelataase; HmuT and HmuU, which are similar in sequence to permeases; and HmuV, annotated as an ATP-binding protein engaged in hemin import [25]. Further studies, e.g. of the HmuY/HmuR interaction, are necessary to understand this novel heme transfer mechanism for bacterial survival.

## Conclusions

Pathogenic bacteria have evolved sophisticated mechanisms in response to the changing environment and the host antimicrobial defense systems. The multiprotein system possibly encoded by the *hmu* operon in proteobacteria, bacteroidetes, spirochaetes, and chlorobi, contributes to heme uptake and utilization for bacterial survival and infection. As pathogenic bacteria continue to develop resistance to antibiotics, targeting nutrient uptake systems may offer novel strategies to combat microorganisms such as *P. gingivalis*, a formidable pathogen. In this context, these data on structure and function of the *hmu*-encoded heme-binding protein, HmuY, which may have also a role in the host immune response and in interaction with host cells, may lead to the development of novel therapeutic approaches to pathogen incapacitation. The high stability of HmuY given by its unique structure makes it a suitable candidate for biotechnological and biomedical applications.

## Materials and Methods

### Protein production and purification

*P. gingivalis* apo-HmuY lacking the first 25 residues of the DNA-derived protein sequence (NCBI accession number CAM 31898) and a variant lacking the first 21 residues but containing a C-terminal HSV and His8-tag, were expressed using plasmids pHmuY11 or pDB and *E. coli* ER2566 (New England Biolabs) cells, and purified as previously reported [23,43]. A protein variant incorporating selenomethionine instead of methionine was prepared using plasmid pHmuY11 and the same cells, which were added to 500 mL of minimal medium lacking methionine and implemented with 25 mg of selenomethionine (Sigma) 30 min before induction [55]. Holo-HmuY was reconstituted from heme and apo-HmuY by incubating 1 equivalent of protein with 1 equivalent of heme (ICN Biomedicals) at room temperature. Excess heme was removed by gel filtration through a PD-10 desalting column (Amersham Pharmacia). To purify HmuY from culture media, *P. gingivalis* cells were cultured anaerobically on blood-agar plates and then in basal medium supplemented with hemin or dipirydydyl as described previously [23]. Cultures were centrifuged at  $20,000 \times g$  for 20 min at  $4^\circ\text{C}$ , supernatants filtered using membranes with a pore size of  $0.22 \mu\text{m}$ , dialyzed against 50 mM Tris/HCl buffer, 25 mM NaCl, pH 7.6, and concentrated using 10-kDa cut-off membranes (Amicon). Concentrated media were further ultracentrifuged (Beckman) at  $100,000 \times g$  for 2 h at  $4^\circ\text{C}$  and supernatants were used to purify HmuY.

### UV-Vis absorption, circular dichroism (CD), and intrinsic fluorescence spectroscopies

UV-Vis spectra were recorded with an Agilent 8453E UV-Vis spectrophotometer (Agilent Technologies). Far-UV CD spectros-



copy (205–255 nm) was carried out using a Jasco J-810 spectropolarimeter and 10-mm-path-length cuvettes. For thermal denaturation experiments, CD spectra were recorded from 210 to 250 nm. The CD signals at 225 nm were monitored as a function of temperature from 20 to 80°C. Protein samples were examined in 20 mM sodium phosphate, 20 mM NaCl, pH 7.4 or 20 mM sodium phosphate, 1 M GdnHCl, pH 6.5.

GdnHCl unfolding experiments were performed according to standard protocols [56]. A stock of 6 M GdnHCl (MP Biochemicals) was used to prepare solutions in 20 mM sodium phosphate, 20 mM NaCl, pH 7.4 and variable GdnHCl concentrations (0 to 6 M). Subsequently, concentrations of GdnHCl solutions were determined through measurement of their refractive index at 25°C using a Zeiss refractometer. Apo- and holo-HmuY (protein:cofactor ratio 1:1) were added to each sample at 2 μM final concentration and incubated at 25°C for 18 h. GdnHCl-induced chemical denaturation was monitored at 20°C by CD using a Jasco J-810 spectropolarimeter and by intrinsic tryptophan fluorescence using a Jasco FP-750 spectrofluorometer. Samples were excited at 295 nm for fluorescence measurements and the emission spectra from 300 to 700 nm were recorded (slit width 5 nm). CD and fluorescence data were transformed to yield the relative fraction of unfolded protein and to determine the free energy of denaturation.

### Susceptibility to proteolysis

HmuY was subjected to proteolysis by trypsin, Kgp, RgpA, and RgpB. For tryptic digestion, two reactions with HmuY in 100 mM Tris/HCl, 20 mM CaCl<sub>2</sub>, pH 8.0 at 1:50 protease:substrate molar ratio were conducted in the presence (1:1 molar ratio) and absence of heme. Fresh portions of trypsin were added every 1 h during the first 12 h, and then every 12 h. For assays with gingipains, proteases were pre-incubated in 200 mM HEPES, 10 mM cysteine, pH 7.6 for 15 min at 37°C prior to addition of HmuY purified from *E. coli* cells or *P. gingivalis* culture medium (1:20 protease:substrate molar ratio) and further incubation for 1 or 20 h at 37°C. Aliquots were taken from the reaction mixtures at given time points, and the reaction was inhibited by addition of a protease-inhibitor cocktail (Roche) and through boiling in SDS-PAGE sample buffer. Control reactions were performed in the absence of protease. HmuY samples previously subjected to thermal denaturation (95°C, 10 min) were also assayed for proteolytic susceptibility. All samples were examined by 15%-Tris/glycine SDS-PAGE and Coomassie Brilliant Blue G-250 staining.

### Crystallization and diffraction data collection

Crystallization assays were performed following the sitting-drop vapor diffusion method. Reservoir solutions were prepared by a Tecan robot and 200-nL crystallization drops were dispensed on 96×2-well MRC plates (Wilden/Innovadyne) by a Cartesian nanodrop robot (Genomic Solutions) at the joint IBMB-CSIC/IRB/Barcelona Science Park High-Throughput Crystallography Platform (PAC). Best crystals as thin reddish prisms appeared in a Bruker steady-temperature crystal farm at 20°C using protein solution (26 mg/mL in 5 mM Tris/HCl, pH 8.0) and 2.4 M (NH<sub>4</sub>)<sub>2</sub>SO<sub>4</sub>, 0.1 M MES, pH 6.0 as reservoir solution and D(+)-glucose monohydrate as additive (relative volumetric ratios 1:1:0.35). These conditions were successfully scaled up to the microliter range with Cryschem crystallization dishes (Hampton Research). Crystals of selenomethionine-derivatized protein were obtained under similar conditions. Cryoprotection of protein

crystals for diffraction data collection was achieved through harvesting with 3.0 M (NH<sub>4</sub>)<sub>2</sub>SO<sub>4</sub>, 0.1 M MES, pH 6.0 and subsequent stepwise replacement of the mother liquor with 3.0 M (NH<sub>4</sub>)<sub>2</sub>SO<sub>4</sub>, 25% glycerol, 0.1 M MES, pH 6.0. Complete diffraction datasets were collected at 100 K from a single flash-cryo-cooled (Oxford Cryosystems) native crystal (at λ = 1.0000 Å) and from a derivatized crystal (at λ = 0.9792 Å; absorption peak for selenium determined through a fluorescence scan performed with a Si-drift chamber detector (Rontec)) on an ADSC Q315R CCD detector at beam line ID23-1 of the European Synchrotron Radiation Facility (ESRF, Grenoble, France) within the Block Allocation Group “BAG Barcelona”. Crystals were tetragonal and harbored one dimer per asymmetric unit (V<sub>M</sub> = 2.5 Å<sup>3</sup>/Da; 58% solvent contents). Diffraction data were integrated, scaled, merged, and reduced with programs XDS [57] and SCALA within the CCP4 suite [58] (see Table 2).

### Structure solution and refinement

The structure was solved by SIRAS by using native and selenomethionine-derivative diffraction data and programs SHELXD/E under phase extension to 1.8 Å [59]. The phases obtained were subjected to a density modification step with program DM within CCP4 and an electron density map was computed. Subsequently, manual model building on a Silicon-Graphics workstation using program TURBO-Frodo alternated with crystallographic refinement with REFMAC5 within the CCP4 suite until completion of the model (see Table 2). This model contained protein residues Glu35 to Lys216 *plus* a heme cofactor for each of the two protein chains within the crystal asymmetric unit (molecules A and B). The ten N-terminal residues of the protein were flexible and were not traced. Both molecules were equivalent in practice (*rms* deviation for all atoms equaled 0.57 Å), so discussion of the structure considered only molecule A unless otherwise stated.

### Miscellaneous

Figures were prepared with programs SETOR [60] and Carrara 4. Structural similarity searches were performed with programs DALI ([http://ekhidna.biocenter.helsinki.fi/dali\\_server](http://ekhidna.biocenter.helsinki.fi/dali_server)), SSM (<http://www.ebi.ac.uk/msd-srv/ssm>), VAST (<http://www.ncbi.nlm.nih.gov/Structure/VAST/vast.shtml>), and the CATHEDRAL server (<http://www.cathdb.info/>). Cavity volumes were computed with program PDBsum (<http://www.ebi.ac.uk/pdbsum>). The final co-ordinates of holo-HmuY have been deposited with the PDB at [www.pdb.org](http://www.pdb.org) (access code 3H8T). Inter- and intra-molecular close contacts (<4 Å) and contact surfaces (with a rolling sphere of 1.4 Å) were determined with program CNS [61]. The value of interaction surfaces was estimated taking the half of the difference between the sum of the individual molecular surfaces and the total complex surface.

### Acknowledgments

We acknowledge the help provided by EMBL and ESRF synchrotron local contacts and thank Robin Rycroft for helpful suggestions to the manuscript.

### Author Contributions

Conceived and designed the experiments: HW MO JP TO FXGR. Performed the experiments: HW TG CT AS MS FXGR. Analyzed the data: CT MS FXGR. Contributed reagents/materials/analysis tools: TG MO TO FXGR. Wrote the paper: JP MS FXGR.

**Table 2.** Crystallographic data.

| Dataset                                                                                        | Native                                                                                 | Seleno-Methionine Derivative                   |
|------------------------------------------------------------------------------------------------|----------------------------------------------------------------------------------------|------------------------------------------------|
| Space group/cell constants (a and c, in Å)                                                     | P4 <sub>2</sub> 2 <sub>1</sub> 2/93.74; 113.73                                         | P4 <sub>2</sub> 2 <sub>1</sub> 2/93.64; 113.77 |
| Number of measurements/unique reflections                                                      | 613,987/47,568                                                                         | 320,816/29,379                                 |
| Resolution range (Å) (outermost shell)                                                         | 48.6–1.80 (1.90–1.80)                                                                  | 48.6–2.11 (2.22–2.11)                          |
| Completeness (%)                                                                               | 100.0 (99.9)                                                                           | 98.4 (89.2)                                    |
| R <sub>r.i.m.</sub> (= R <sub>meas</sub> )/R <sub>p.i.m.</sub> <sup>a,b,c</sup>                | 0.101(0.696)/0.028(0.190)                                                              | 0.081(0.224)/0.027(0.089)                      |
| Average intensity over st. dev. (<I>/σ<I>)>                                                    | 23.0 (4.2)                                                                             | 23.9 (7.3)                                     |
| B-factor (Wilson) (Å <sup>2</sup> )/average multiplicity                                       | 17.6/12.9 (13.1)                                                                       | 21.0/10.9 (5.9)                                |
| Heavy-atom sites used for phasing/ <i>fom</i> <sup>d</sup>                                     |                                                                                        | 9/0.68, 0.84                                   |
| Resolution range used for refinement (Å)                                                       | 48.6–1.80                                                                              |                                                |
| Number of reflections used (test set)                                                          | 46,847 (720)                                                                           |                                                |
| Crystallographic R <sub>factor</sub> (free R <sub>factor</sub> ) <sup>e</sup>                  | 0.160 (0.187)                                                                          |                                                |
| No. of protein atoms/solvent molecules/ligands/ions                                            | 2,870/432/2 heme (with Fe <sup>3+</sup> ); 6 glycerols/5 SO <sub>4</sub> <sup>2-</sup> |                                                |
| Rmsd from target values                                                                        |                                                                                        |                                                |
| bonds (Å)/angles (°)                                                                           | 0.012/1.31                                                                             |                                                |
| bonded B-factors (main chain/side chain) (Å <sup>2</sup> )                                     | 0.70/2.19                                                                              |                                                |
| Average B-factors for protein atoms (Å <sup>2</sup> )                                          | 14.1                                                                                   |                                                |
| Main-chain conformational angle analysis for residues in favored regions/outliers/all residues | 349/0/360                                                                              |                                                |

<sup>a</sup>Friedel mates were treated as independent reflections in the derivative dataset.

<sup>b</sup>Values in parentheses refer to the outermost resolution shell.

<sup>c</sup>R<sub>r.i.m.</sub> =  $\sum_{hkl} \{(|I_{hkl}|/I_{hkl} - 1)\}^{1/2} \sum_i |I_i(hkl) - \langle I(hkl) \rangle| / \sum_{hkl} \sum_i |I_i(hkl)|$  and R<sub>p.i.m.</sub> =  $\sum_{hkl} \{(|I_{hkl}| - 1)\}^{1/2} \sum_i |I_i(hkl) - \langle I(hkl) \rangle| / \sum_{hkl} \sum_i |I_i(hkl)|$ .

<sup>d</sup>Mean figure of merit computed for data to 1.8 Å before and after density modification with program DM within CCP4.

<sup>e</sup>Crystallographic R<sub>factor</sub> =  $\sum_{hkl} ||F_{obs}| - k |F_{calc}|| / \sum_{hkl} |F_{obs}|$ ; free R<sub>factor</sub>, same for a test set of reflections not used during refinement.

<sup>f</sup>Including atoms in alternate conformation.

doi:10.1371/journal.ppat.1000419.t002

## References

- Fox CH (1992) New considerations in the prevalence of periodontal disease. *Curr Opin Dent* 2: 5–11.
- Cutler CW, Kalmar JR, Genco CA (1995) Pathogenic strategies of the oral anaerobe, *Porphyromonas gingivalis*. *Trends Microbiol* 3: 45–51.
- Meurman JH, Sanz M, Janket SJ (2004) Oral health, atherosclerosis, and cardiovascular disease. *Crit Rev Oral Biol Med* 15: 403–413.
- Rosenstein ED, Greenwald RA, Kushner LJ, Weissmann G (2004) Hypothesis: The humoral immune response to oral bacteria provides a stimulus for the development of rheumatoid arthritis. *Inflammation* 28: 311–318.
- Lin D, Moss K, Beck JD, Hefti A, Offenbacher S (2007) Persistently high levels of periodontal pathogens associated with preterm pregnancy outcome. *J Periodontol* 78: 833–841.
- Schiffeler RE, Shostad SA, Bayers-Thering MT, Dyer DW, Neiders ME (1996) Effect of protoporphyrin IX limitation on *Porphyromonas gingivalis*. *J Endod* 22: 352–355.
- Smalley JW, Birss AJ, Silver J (2000) The periodontal pathogen *Porphyromonas gingivalis* harnesses the chemistry of the μ-oxo bishaem of iron protoporphyrin IX to protect against hydrogen peroxide. *FEMS Microbiol Lett* 183: 159–164.
- Nelson KE, Fleischmann RD, DeBoy RT, Paulsen IT, Fouts DE, et al. (2003) Complete genome sequence of the oral pathogenic bacterium *Porphyromonas gingivalis* strain W83. *J Bacteriol* 185: 5591–5601.
- Bramanti TE, Holt SC (1991) Roles of porphyrins and host iron transport proteins in regulation of growth of *Porphyromonas gingivalis* W50. *J Bacteriol* 173: 7330–7339.
- Sroka A, Sztukowska M, Potempa J, Travis J, Genco CA (2001) Degradation of host heme proteins by lysine- and arginine-specific cysteine proteinases (gingipains) of *Porphyromonas gingivalis*. *J Bacteriol* 183: 5609–5616.
- Braun V (1995) Energy-coupled transport and signal transduction through the gram-negative outer membrane via TonB-ExbB-ExbD-dependent receptor proteins. *FEMS Microbiol Rev* 16: 295–307.
- Potempa J, Sroka A, Inamura T, Travis J (2003) Gingipains, the major cysteine proteinases and virulence factors of *Porphyromonas gingivalis*: Structure, function and assembly of multidomain protein complexes. *Curr Protein Pept Sci* 4: 397–407.
- Wandersman C, Delepelaire P (2004) Bacterial iron sources: From siderophores to hemophores. *Annu Rev Microbiol* 58: 611–647.
- Lee BC (1995) Quelling the red menace: Haem capture by bacteria. *Mol Microbiol* 18: 383–390.
- Krieg S, Huche F, Diederichs K, Izadi-Pruneyre N, Lecroisey A, et al. (2009) Heme uptake across the outer membrane as revealed by crystal structures of the receptor-hemophore complex. *Proc Natl Acad Sci U S A* 106: 1045–1050.
- Hanson MS, Pelzel SE, Latimer J, Müller-Eberhard U, Hansen EJ (1992) Identification of a genetic locus of *Haemophilus influenzae* type b necessary for the binding and utilization of heme bound to human hemopexin. *Proc Natl Acad Sci U S A* 89: 1973–1977.
- Letoffe S, Redeker V, Wandersman C (1998) Isolation and characterization of an extracellular haem-binding protein from *Pseudomonas aeruginosa* that shares function and sequence similarities with the *Serratia marcescens* HasA hemophore. *Mol Microbiol* 28: 1223–1234.
- Arnoux P, Haser R, Izadi N, Lecroisey A, Delepierre M, et al. (1999) The crystal structure of HasA, a hemophore secreted by *Serratia marcescens*. *Nat Struct Mol Biol* 6: 516–520.
- Rossi MS, Fetherston JD, Letoffe S, Carniel E, Perry RD, et al. (2001) Identification and characterization of the hemophore-dependent heme acquisition system of *Yersinia pestis*. *Infect Immun* 69: 6707–6717.
- Maresso AW, Garufi G, Schneewind O (2008) Bacillus anthracis secretes proteins that mediate heme acquisition from hemoglobin. *PLoS Pathog* 4: e1000132. doi:10.1371/journal.ppat.1000132.
- Genco CA, Dixon DW (2001) Emerging strategies in microbial haem capture. *Mol Microbiol* 39: 1–11.
- Olczak T, Simpson W, Liu X, Genco CA (2005) Iron and heme utilization in *Porphyromonas gingivalis*. *FEMS Microbiol Rev* 29: 119–144.
- Olczak T, Sroka A, Potempa J, Olczak M (2008) *Porphyromonas gingivalis* HmuY and HmuR: Further characterization of a novel mechanism of heme utilization. *Arch Microbiol* 189: 197–210.
- Wu J, Lin X, Xie H (2009) Regulation of heme binding proteins by a novel transcriptional activator in *Porphyromonas gingivalis*. *J Bacteriol* 191: 115–122.
- Lewis JP, Plata K, Yu F, Rosato A, Anaya C (2006) Transcriptional organization, regulation and role of the *Porphyromonas gingivalis* W83 hmu haemin-uptake locus. *Microbiology* 152: 3367–3382.
- Mihara J, Holt SC (1993) Purification and characterization of fibroblast-activating factor isolated from *Porphyromonas gingivalis* W50. *Infect Immun* 61: 588–595.

27. Wójtowicz H, Wojcyszynski J, Olczak M, Kroliczewski J, Latos-Grazynski L, et al. (2009) Characterization of the heme environment in *Porphyromonas gingivalis* HmuY heme-binding protein. *Biochem Biophys Res Commun* 383: 178–182.
28. Alontaga AY, Rodríguez JC, Schönbrunn E, Becker A, Funke T, et al. (2009) Structural characterization of the hemophore HasAp from *Pseudomonas aeruginosa*: NMR spectroscopy reveals protein-protein interactions between Holo-HasAp and hemoglobin. *Biochemistry* 48: 96–109.
29. Wolff N, Izadi-Pruneyre N, Couprie J, Habeck M, Linge J, et al. (2008) Comparative analysis of structural and dynamic properties of the loaded and unloaded hemophore HasA: Functional implications. *J Mol Biol* 376: 517–525.
30. Landfried DA, Vuletic DA, Pond MP, Lecomte JT (2007) Structural and thermodynamic consequences of heme binding for monomeric apoglobins and other apoproteins. *Gene* 398: 12–28.
31. Petsko GA, Ringe D (2003) Protein structure and function. London: New Science Press (Sinauer Associated & Blackwell).
32. Paoli M, Anderson BF, Baker HM, Morgan WT, Smith A, et al. (1999) Crystal structure of hemopexin reveals a novel high-affinity heme site formed between two  $\beta$ -propeller domains. *Nat Struct Biol* 6: 926–931.
33. Lo Conte L, Chothia C, Janin J (1999) The atomic structure of protein-protein recognition sites. *J Mol Biol* 285: 2177–2198.
34. Iverson TM, Hendrich MP, Arciero DM, Hooper AB, Rees DC (2001) Cytochrome  $c_{554}$ . In: Messerschmidt A, Huber R, Poulos T, Wiegardt K, eds (2001) Handbook of metalloproteins. Chichester (UK): John Wiley & Sons, Ltd. pp 136–146.
35. Carrondo MA, Doares CM, Matias PM (2001) Nine-heme cytochrome c. In: Messerschmidt A, Huber R, Poulos T, Wiegardt K, eds (2001) Handbook of metalloproteins. Chichester (UK): John Wiley & Sons, Ltd. pp 147–158.
36. Phillips GN Jr (2001) Myoglobin. In: Messerschmidt A, Huber R, Poulos T, Wiegardt K, eds (2001) Handbook of metalloproteins. Chichester (UK): John Wiley & Sons, Ltd. pp 5–15.
37. Paoli M, Nagai K (2001) Hemoglobin. In: Messerschmidt A, Huber R, Poulos T, Wiegardt K, eds (2001) Handbook of metalloproteins. Chichester (UK): John Wiley & Sons, Ltd. pp 16–30.
38. Wardell M, Wang Z, Ho JX, Robert J, Ruker F, et al. (2002) The atomic structure of human methemalbumin at 1.9 Å. *Biochem Biophys Res Commun* 291: 813–819.
39. Gomis-Rüth FX (2004) Hemopexin domains. In: Messerschmidt A, Bode W, Cygler M, eds (2004) Handbook of metalloproteins. Chichester (UK): John Wiley & Sons, Ltd. pp 631–646.
40. Olczak T, Dixon DW, Genco CA (2001) Binding specificity of the *Porphyromonas gingivalis* heme and hemoglobin receptor HmuR, gingipain K, and gingipain R1 for heme, porphyrins, and metalloporphyrins. *J Bacteriol* 183: 5599–5608.
41. Liu X, Olczak T, Guo HC, Dixon DW, Genco CA (2006) Identification of amino acid residues involved in heme binding and hemoprotein utilization in the *Porphyromonas gingivalis* heme receptor HmuR. *Infect Immun* 74: 1222–1232.
42. Hayashi S, Wu HC (1990) Lipoproteins in bacteria. *J Bioenerg Biomembr* 22: 451–471.
43. Olczak T, Siudeja K, Olczak M (2006) Purification and initial characterization of a novel *Porphyromonas gingivalis* HmuY protein expressed in *Escherichia coli* and insect cells. *Protein Expr Purif* 49: 299–306.
44. Ang CS, Veith PD, Dashper SG, Reynolds EC (2008) Application of  $^{16}\text{O}/^{18}\text{O}$  reverse proteolytic labeling to determine the effect of biofilm culture on the cell envelope proteome of *Porphyromonas gingivalis* W50. *Proteomics* 8: 1645–1660.
45. Dashper SG, Ang CS, Veith PD, Mitchell HL, Lo AW, et al. (2009) Response of *Porphyromonas gingivalis* to heme limitation in continuous culture. *J Bacteriol* 191: 1044–1055.
46. Tollefsen T, Saltvedt E (1980) Comparative analysis of gingival fluid and plasma by crossed immunoelectrophoresis. *J Periodontol Res* 15: 96–106.
47. Hrkal Z, Vodrazka Z, Kalousek I (1974) Transfer of heme from ferrihemoglobin and ferrihemoglobin isolated chains to hemopexin. *Eur J Biochem* 43: 73–78.
48. Hargrove MS, Barrick D, Olson JS (1996) The association rate constant for heme binding to globin is independent of protein structure. *Biochemistry* 35: 11293–11299.
49. Hwang PK, Greer J (1980) Interaction between hemoglobin subunits in the hemoglobin-haptoglobin complex. *J Biol Chem* 255: 3038–3041.
50. Beaven GH, Chen SH, d'Albis A, Gratzel WB (1974) A spectroscopic study of the haemin-human-serum-albumin system. *Eur J Biochem* 41: 539–546.
51. Smalley JW, Birss AJ, Szmigielski B, Potempa J (2008) Mechanism of methaemoglobin breakdown by the lysine-specific gingipain of the periodontal pathogen *Porphyromonas gingivalis*. *Biol Chem* 389: 1235–1238.
52. Smalley JW, Birss AJ, Szmigielski B, Potempa J (2007) Sequential action of R- and K-specific gingipains of *Porphyromonas gingivalis* in the generation of the haem-containing pigment from oxyhaemoglobin. *Arch Biochem Biophys* 465: 44–49.
53. Carlsson J, Hofling JF, Sundqvist GK (1984) Degradation of albumin, haemopexin, haptoglobin and transferrin, by black-pigmented *Bacteroides* species. *J Med Microbiol* 18: 39–46.
54. Tompkins GR, Wood DP, Birchmeier KR (1997) Detection and comparison of specific heme binding by *Porphyromonas gingivalis* and *Prevotella intermedia*. *J Bacteriol* 179: 620–626.
55. Hendrickson WA, Horton JR, LeMaster DM (1990) Selenomethionyl proteins produced for analysis by multiwavelength anomalous diffraction (MAD): A vehicle for direct determination of three-dimensional structure. *EMBO J* 9: 1665–1672.
56. Pace CN (1986) Determination and analysis of urea and guanidine hydrochloride denaturation curves. *Meth Enzymol* 131: 266–280.
57. Kabsch W (2001) Chapter 25.2.9: XDS. In: Rossmann MG, Arnold E, eds (2001) International Tables for Crystallography Volume F: Crystallography of Biological Macromolecules. 1st ed. Dordrecht (The Netherlands): Kluwer Academic Publishers (for The International Union of Crystallography). pp 730–734.
58. CCP4 (1994) The CCP4 suite: Programs for protein crystallography. *Acta Crystallogr Sect D* 50: 760–763.
59. Sheldrick GM (2008) A short history of *SHELX*. *Acta Cryst sect A* 64: 112–122.
60. Evans SV (1993) SETOR: Hardware lighted three-dimensional solid model representations of macromolecules. *J Mol Graphics* 11: 134–138.
61. Brünger AT, Adams PD, Clore GM, DeLano WL, Gros P, et al. (1998) Crystallography & NMR System: A new software suite for macromolecular structure determination. *Acta Crystallogr Sect D* 54: 905–921.
